# Supplementary material
Source: bioRxiv or medRxiv preprint supplement (https://medrxiv.org/content/medrxiv/early/2024/04/01/2024.03.31.24305130.1/DC1/embed/media-1.pdf)
Supplement: Supplementary file [file media-1.pdf]

**Supplemental Materials for:**

**Genetic admixture predictors of fetal alcohol spectrum disorders (FASD) in the South African Cape Coloured population.**

R. Colin Carter, Zikun Yang, Tugba Akkaya-Hocagil, Sandra W. Jacobson, Joseph L. Jacobson, Neil C. Dodge, H. Eugene Hoyme, Steven H. Zeisel, Ernesta M. Meintjes, Caghan Kizil, Giuseppe Tosto

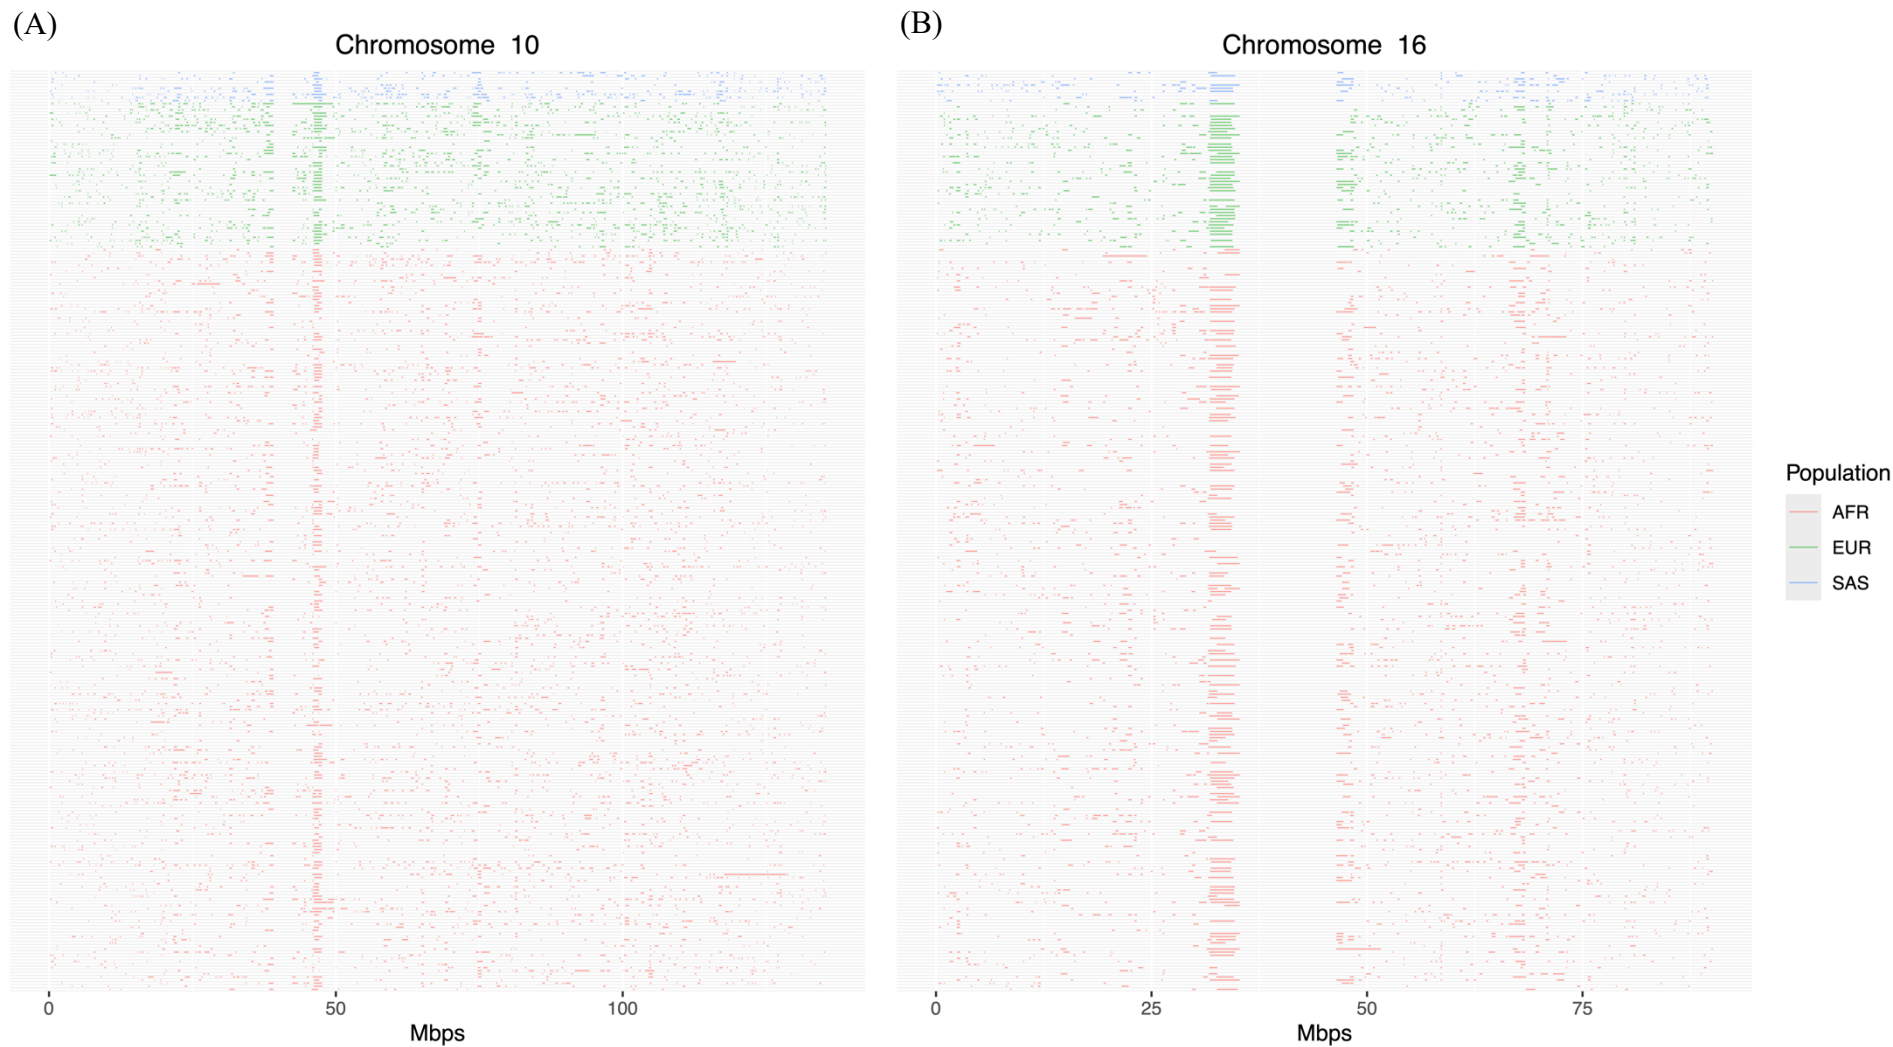

**Figure S1.** Runs of homozygosity (ROHs) with high overlap, color-coded by ancestral origin, among 296 unrelated mothers in chromosomes 10 (A) and 16 (B). Ancestry designation was made if >80% of variants within the ROH traced back to a given ancestry.

**Table S1.** Average ancestral percentage (%) of samples by populations<sup>a</sup>

|                              |                     | <b>K</b>            | <b>1</b> | <b>2</b> | <b>3</b> | <b>4</b> | <b>5</b> | <b>6</b> |
|------------------------------|---------------------|---------------------|----------|----------|----------|----------|----------|----------|
|                              |                     | Study sample (SACC) | 14.5     | 42.7     | 15.7     | 18.2     | 1.9      | 6.9      |
| <b>REFERENCE POPULATIONS</b> | <b>AFRICAN</b>      | Yoruba              | 99.3     | 0.7      | 0        | 0        | 0        | 0        |
|                              |                     | Mandenka            | 99.6     | 0        | 0        | 0.3      | 0        | 0        |
|                              |                     | Gambian             | 99.7     | 0        | 0        | 0.3      | 0        | 0        |
|                              |                     | Bantu South Africa  | 63       | 37       | 0        | 0        | 0        | 0        |
|                              |                     | Bantu Kenya         | 72.6     | 26       | 0.2      | 1.2      | 0        | 0        |
|                              |                     | San                 | 0        | 100      | 0        | 0        | 0        | 0        |
|                              | <b>EUROPEAN</b>     | French              | 0.1      | 0        | 0.1      | 99.8     | 0        | 0        |
|                              |                     | British             | 0        | 0        | 0        | 100      | 0        | 0        |
|                              |                     | Italian             | 0        | 0        | 1.9      | 98.1     | 0        | 0        |
|                              |                     | Northern European   | 0        | 0        | 0        | 100      | 0        | 0        |
|                              | <b>SOUTH ASIANS</b> | Bengali             | 0        | 0        | 94.3     | 1.9      | 2.4      | 1.4      |
|                              | <b>EAST ASIANS</b>  | Chinese South       | 0        | 0        | 0        | 0        | 79       | 21       |
|                              |                     | Chinese North       | 0        | 0        | 0.5      | 0.2      | 87.9     | 11.5     |
|                              |                     | Cambodian           | 0        | 0        | 10.2     | 0        | 23.8     | 66       |
|                              |                     | Vietnamese (Kinh)   | 0        | 0        | 0.1      | 0.1      | 14       | 85.7     |
| Lahu                         |                     | 0                   | 0        | 0        | 0        | 34.3     | 65.7     |          |

<sup>a</sup>Results were computed by ADMIXTURE (1) with the number of ancestries set at 6 (K=6) using uncorrelated genetic markers in 352 unrelated SACC individuals and HGDP and 1000G African, European, South Asian, and East Asian reference populations.

**Table S2.** Ancestry proportion comparisons between Cape Malay and all other Cape Coloured participants<sup>a</sup>

|                          | Cape Malay |               | All other Cape Coloured |               | <i>p</i> <sup>b</sup> |
|--------------------------|------------|---------------|-------------------------|---------------|-----------------------|
|                          | <i>n</i>   | <i>M</i> (SD) | <i>n</i>                | <i>M</i> (SD) |                       |
| <u>Maternal Ancestry</u> |            |               |                         |               |                       |
| % African                | 63         | 42.9 (17.2)   | 218                     | 54.9 (19.4)   | <0.001                |
| % European               | 63         | 28.0 (11.1)   | 218                     | 24.9 (13.0)   | 0.053                 |
| % South Asian            | 63         | 23.5 (8.9)    | 218                     | 16.3 (8.5)    | <0.001                |
| % East Asian             | 63         | 5.8 (2.9)     | 218                     | 4.0 (2.5)     | <0.001                |
| <u>Child Ancestry</u>    |            |               |                         |               |                       |
| % African                | 55         | 41.2 (12.7)   | 202                     | 53.2 (18.0)   | <0.001                |
| % European               | 56         | 28.9 (9.0)    | 202                     | 25.3 (11.2)   | 0.013                 |
| % South Asian            | 56         | 24.4 (6.8)    | 202                     | 17.3 (8.0)    | <0.001                |
| % East Asian             | 56         | 5.5 (2.5)     | 202                     | 4.2 (2.4)     | <0.001                |

<sup>a</sup>Cape Malay status missing for 28 mother-child dyads.<sup>b</sup>From independent samples *t*-tests**Table S3.** Correlations between 4-group ancestry<sup>a</sup> and runs of homozygosity among 296 unrelated mothers<sup>b</sup>

| Ancestry      | Homozygosity |
|---------------|--------------|
| % African     | -0.89***     |
| % European    | 0.78***      |
| % South Asian | 0.70***      |
| % East Asian  | 0.49***      |

\*\*\**p* < .001.<sup>a</sup>Estimated with ELAI (2) method.<sup>b</sup>Values are Pearson *r*.**Table S4.** Prevalence of deleterious variants in the 10 most overlapping runs of homozygosity among 296 unrelated mothers

| Local Ancestry | # of mothers with ROH | Total # of deleterious variants | Poisson <i>p</i> |
|----------------|-----------------------|---------------------------------|------------------|
| AFR            | 27                    | 19                              | 0.023            |
| non-AFR        | 64                    | 21                              |                  |

## REFERENCES

1. Alexander DH, Novembre J, Lange K. Fast model-based estimation of ancestry in unrelated individuals. *Genome Res* 2009;19(9):1655-64. doi: 10.1101/gr.094052.109.
2. Guan Y. Detecting structure of haplotypes and local ancestry. *Genetics* 2014;196(3):625-42. doi: 10.1534/genetics.113.160697.
